# Supplementary material for: Retracted Article: CircBANP acts as a sponge of let-7a to promote gastric cancer progression via the FZD5/Wnt/β-catenin pathway
Source: Royal Society of Chemistry journal article supplement (doi:10.1039/c9ra09887a), 2020-01-01
Supplement: c9ra09887a1.pdf [file c9ra09887a1.pdf]

1

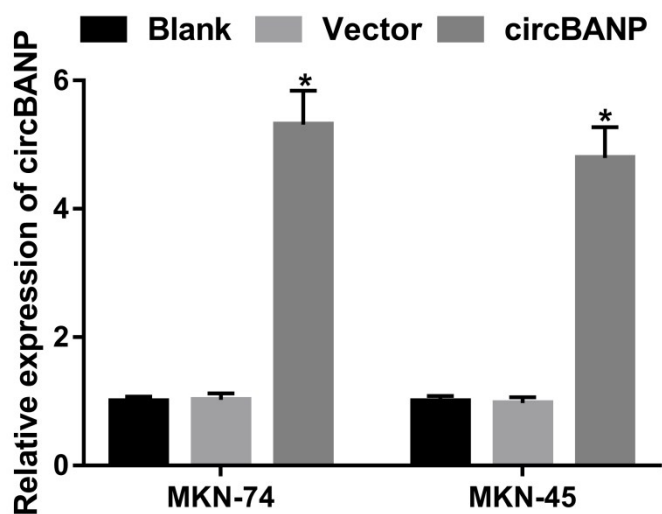

2

3

4 **Supplement Figure 1.** CircBANP expression was increased by transfection of  
5 circBANP overexpression plasmid in GC cells. MKN-74 and MKN-45 cells were  
6 transfected with blank, Vector or circBANP overexpression plasmid for 48 h,  
7 followed by the detection of circBANP expression by qRT-PCR. CircBANP:  
8 circBANP overexpression plasmid. \* $P < 0.05$  v. Vector.

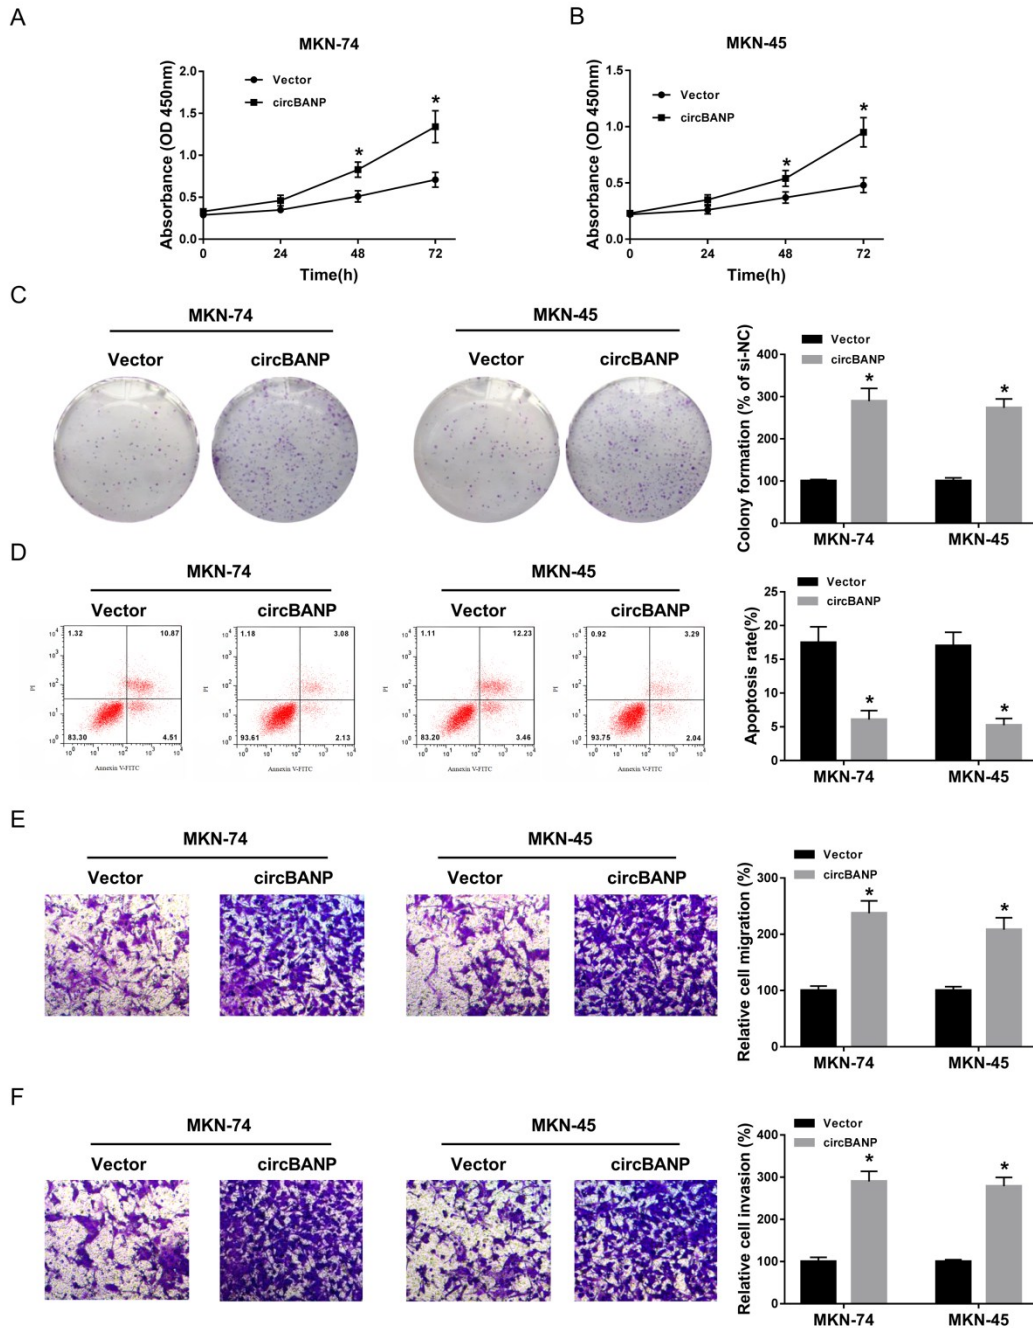

9

10 **Supplement Figure 2.** CircBANP overexpression enhanced cell proliferation, colony  
 11 formation, migration and invasion and suppressed cell apoptosis in GC cells. MKN-  
 12 74 and MKN-45 cells were transfected with Vector or circBANP overexpression  
 13 plasmid, followed by the determination of cell proliferation by CCK-8 assay (A and  
 14 B), cell colony formation using a standard colony formation assay (C), cell apoptosis

15 by flow cytometry (D), cell migration (E) and invasion (F) by transwell assay.

16 CircBANP: circBANP overexpression plasmid. \* $P < 0.05$  v. Vector.

17 **Supplement Table 1.** Primers for PCR amplification were listed.

---

Primers for PCR (5'-3')

---

|                         |         |                          |
|-------------------------|---------|--------------------------|
| Divergent-circBANP      | Forward | AGGGACACCTCCACATCGC      |
|                         | Reverse | TGTAGCCAAGATGGAAGACCC    |
| Convergent-linear-BANP  | Forward | CGGCAGAACGCCATTGTA       |
|                         | Reverse | ATTGTGGTGAAGGTGCCG       |
| Divergent-GAPDH         | Forward | GAAGGTGAAGGTCGAGTC       |
|                         | Reverse | GAAGATGGTGATGGGATTTC     |
| Convergent-linear-GAPDH | Forward | CAATGACCCCTTCATTGACC     |
|                         | Reverse | TTGATTTTGGAGGGATCTCG     |
| CircBANP                | Forward | CAGGACGGTCAGCGTCGT       |
|                         | Reverse | GGCACAGCGTTGCTAATGAC     |
| Linear-BANP             | Forward | TCGGCAGAACACCATTGTGG     |
|                         | Reverse | G TTCAGGGTGATGAGCGTGAC   |
| GAPDH                   | Forward | GAATGGGCAGCCGTTAGGAA     |
|                         | Reverse | AAAAGCATCACCCGGAGGAG     |
| Let-7a                  | Forward | CGATTCAGTGAGGTAGTAGGTTGT |
|                         | Reverse | TATGGTTGTTCTGCTCTCTGTCTC |
| FZD5                    | Forward | CGTTGCCACCTTCCTCATTGAC   |
|                         | Reverse | GCACCAAGAATCCCAGTGACAC   |
| U6                      | Forward | CTCGCTTCGGCAGCACA        |
|                         | Reverse | AACGCTTCACGAATTTGCGT     |

---
